# Supplementary material
Source: PubMed Central journal article supplement (PMC4934897)

**Figure 1. Support Services Provided at Outpatient Healthcare Facilities Funded vs. not Funded by the Ryan White Program, MMP - 2009**

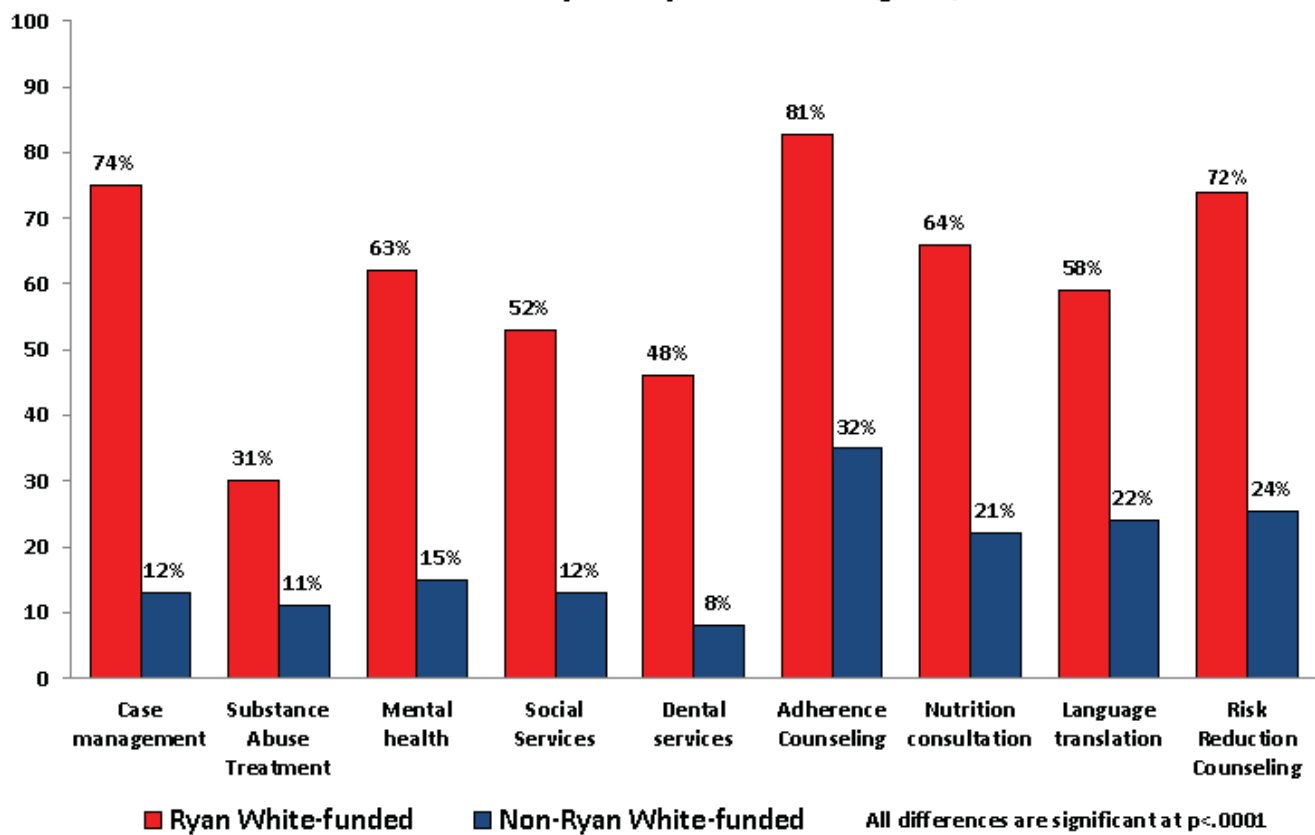

Supplement: NIHMS788776-supplement-a.pdf [file NIHMS788776-supplement-a.pdf]
