# Supplementary material
Source: PubMed Central journal article supplement (PMC4934897)
Supplement: NIHMS788776-supplement-b.pdf [file NIHMS788776-supplement-b.pdf]

**Figure 2. Services Received and Unmet Needs Reported by Patients Attending Healthcare Facilities Funded vs. not Funded by the Ryan White Program, MMP - 2009**

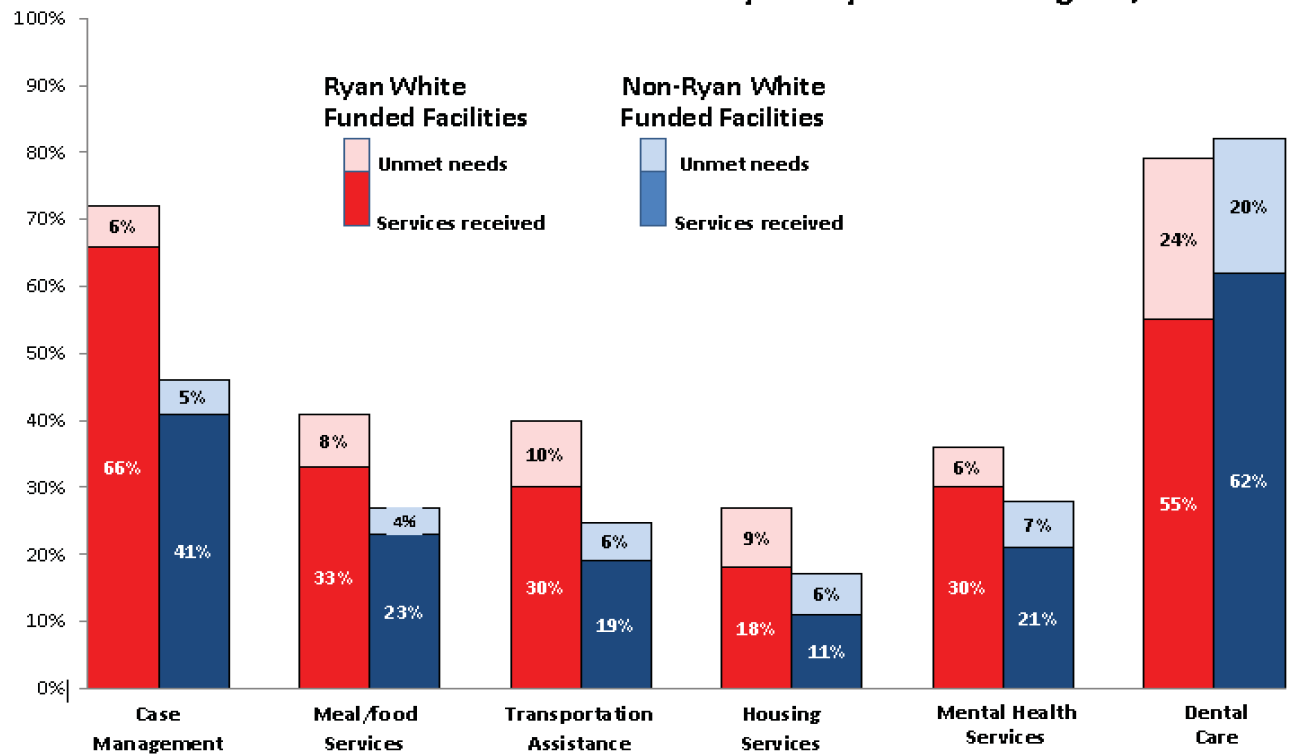

Differences in services received were all significant at  $p < 0.05$

Unmet needs for meal/food services, transportation assistance, housing services significant at  $p < 0.0001$
